1 **Title: Longitudinal Intravital Imaging of Biosensor-labeled *In Situ* Islet Beta Cells**

2

3 **Authors:** Christopher A. Reissaus<sup>1</sup>, Ashley N. Twigg<sup>2</sup>, Kara S. Orr<sup>1</sup>, Abass M. Conteh<sup>4</sup>, Michelle M.  
4 Martinez<sup>5</sup>, Malgorzata M. Kamocka<sup>5</sup>, Richard N. Day<sup>3,6</sup>, Sarah A. Tersey<sup>1,2,3</sup>, Kenneth W. Dunn<sup>3,5</sup>,  
5 Raghavendra G. Mirmira<sup>1,2,3,4,6</sup>, Amelia K. Linnemann<sup>1,2,3,4,6\*</sup>

6

7 **Affiliations:** <sup>1</sup>Department of Pediatrics, Indiana University School of Medicine, Indianapolis, IN, USA,  
8 <sup>2</sup>Herman B Wells Center for Pediatric Research, Indianapolis, IN, USA, <sup>3</sup>The Center for Diabetes and  
9 Metabolic Diseases, Indiana University School of Medicine, Indianapolis, IN, USA, <sup>4</sup>Department of  
10 Biochemistry and Molecular Biology, Indiana University School of Medicine, Indianapolis, IN, USA,  
11 <sup>5</sup>Department of Medicine, Division of Nephrology, Indiana University School of Medicine, Indianapolis,  
12 IN, USA, <sup>6</sup>Department of Cellular and Integrative Physiology, Indiana University School of Medicine,  
13 Indianapolis, IN, USA

14

15 **\*Corresponding Author:**

16 Amelia K. Linnemann, Ph.D.

17 Indiana University School of Medicine

18 Phone: 317-274-1568

19 Email: [aklinnem@iu.edu](mailto:aklinnem@iu.edu)

20

21 **Key Words:** Intravital Microscopy, Biosensor, Pancreatic Islet, ROS, Oxidative Stress, Abdominal  
22 Imaging Windows

23

24 **Abstract:**

25 Impaired function and apoptosis of insulin-secreting islet  $\beta$ -cells is central to disease  
26 progression in both type 1 and type 2 diabetes. Oxidative damage resulting from excess reactive  
27 oxygen species (ROS) is a central factor in  $\beta$ -cell dysfunction and death, but the dynamic nature of  
28 ROS accumulation and its depletion pose a problem for mechanistic studies *in vivo*. Biosensors,  
29 including the redox-sensitive GFP (roGFPs), coupled with intravital microscopy provide a sensitive  
30 and dynamic solution to this problem. Here, we utilize a virally-delivered roGFP2-containing human  
31 glutaredoxin-1 (Grx1-roGFP2) to selectively monitor  $\beta$ -cell ROS dynamics *in vivo* in response to toxic  
32 glucose analogs. We paired viral biosensor delivery with implanted abdominal imaging windows over  
33 the pancreas, thus allowing longitudinal measurements of  $\beta$ -cell ROS and islet area during and after  
34 streptozotocin (STZ) exposure. The studies presented here represent a robust experimental platform  
35 that could be readily adapted to various transgenic or physiological mouse models in conjunction with  
36 any number of available biosensors, and thus opens a vast realm of potential for discovery in islet  
37 biology *in vivo*.

38

39 **Introduction:**

40 The Islet of Langerhans is a complex micro-organ composed of multiple cell types, including  
41 neuro-endocrine, endothelial, neuronal, and immune cells. These cells work in concert to establish a  
42 tightly-regulated milieu that plays a central role in glucose homeostasis. This unique environment is  
43 lost when islets are isolated for characterization *in vitro*. While some of the *in vivo* characteristics of  
44 islets can be recovered using novel culture methods and engineered microenvironments<sup>1</sup>, more  
45 targeted approaches utilizing intravital microscopy have yielded crucial data regarding islet biology *in*  
46 *situ*<sup>2,3</sup>. However, intravital studies in islet biology are currently limited because of the complexity of the  
47 experimental regime and the lack of easily implemented tools to target specific cells for analysis of  
48 physiological function. Here, we present methods to overcome these limitations using selective  $\beta$ -cell  
49 expression of a virally packaged biosensor, Grx1-roGFP2, to measure the dynamics of ROS

50 regulation *in vivo*.

51 Oxidative stress occurs when increased production of cellular oxidants (e.g. ROS) is not  
52 balanced by an increase in cellular antioxidants/antioxidant enzymes. A considerable body of  
53 evidence supports the conclusion that oxidative stress is a common feature of both type 1 and 2  
54 diabetes (T1D/T2D)<sup>4,5</sup>. When unresolved, oxidative stress can trigger  $\beta$ -cell apoptosis. The ability to  
55 study these processes in intact islets within their native environment is currently limited by the lack of  
56 sensitive real-time sensors of ROS generation that can be delivered to specific cells *in vivo*. To  
57 address this, we developed a platform that simplifies the introduction of a cell-specific biosensor  
58 without the need for generation or breeding of biosensor transgenic animals, then analyzed the  
59 biosensor's signaling both *in vitro* and *in vivo*. To enable longitudinal imaging, we coupled this  
60 platform with abdominal imaging windows. This allowed us to make the first observations of  $\beta$ -cell  
61 specific ROS responses over the time-course of STZ exposure, and to couple our observations of  
62 progressive  $\beta$ -cell loss with the development of hyperglycemia.

63

#### 64 **Results:**

65 Several variants of redox-sensitive GFPs, or roGFPs, have been engineered that are sensitive  
66 to different parts of the ROS response cascade or within different cellular compartments. Here, we  
67 used roGFP2 containing human glutaredoxin-1 (Grx1-roGFP2), which is sensitive to the glutathione  
68 redox cycle in the cytoplasm<sup>6</sup>. Though ROS is primarily generated in the mitochondria, literature  
69 supports the idea that the unregulated release of mitochondrial ROS into the cytosol and enhanced  
70 cytoplasmic production of ROS are key features in the progression of cellular oxidative stress<sup>7,8</sup>. We  
71 first generated an adenovirus containing Grx1-roGFP2 under the control of a hybrid insulin/rabbit beta  
72 globin promoter<sup>9</sup> (Ad-INS-Grx1-roGFP2) to label and selectively measure ROS dynamics in islet  $\beta$ -  
73 cells. The specificity of this promoter was confirmed by imaging of adenovirus-infected isolated islets  
74 from mice that were transgenic for a  $\beta$ -cell specific nuclear mCherry tag<sup>10</sup>, as well as by  
75 immunofluorescence against insulin and GFP in infected isolated islet cells and paraffin-embedded  
76 pancreas (Fig S1A-C). Using the  $\beta$ -cell-specific Ad-INS-Grx1-roGFP2, we first validated biosensor

77 activity in isolated wild-type (WT) C57Bl/6J mouse islets using confocal microscopy. We hypothesized  
78 that  $\beta$ -cells might have altered ROS levels upon acute exposure to different glucose concentrations.  
79 The short-term elevation (16.7mM) or reduction (2mM) of glucose from basal stimulatory levels  
80 (defined here as 8mM) over 30 minutes did not alter the 405nm/488nm ratiometric excitation readout  
81 of the biosensor acutely (Fig S1D). We extended incubations to 4 and 16 hours at 2mM, 8mM,  
82 16.7mM, and 25mM glucose levels to exacerbate changes in ROS levels, which resulted in an inverse  
83 relationship between glucose concentrations and ROS, as measured by the ratiometric intensities  
84 from Grx1-roGFP2 (Figure 1A-C). Next, we treated the biosensor-labeled isolated islets *in vitro* with  
85 4mM alloxan monohydrate, a toxic glucose analog that produces ROS when metabolized, to test  
86 whether acute changes in  $\beta$ -cell ROS were measurable with Grx1-roGFP2 (Figure 1D). The  
87 magnitude of change in ROS (1.4 fold at 8mM vs. 2.2 fold at 16.7mM) appeared to be related, in part,  
88 to the concentration of glucose and the roGFP2 ratio at baseline (Figure 1E). Together, these data  
89 demonstrate the ability of roGFP2 to monitor acute and chronic changes in ROS within pancreatic  $\beta$ -  
90 cells.

91 Primary islets maintained *in vitro* are removed from the normal physiological cues once  
92 isolated from the organism. Thus, it is critical to develop a platform to monitor cellular changes in the  
93 native environment of the intact tissue to fully understand cellular responses and disease progression.  
94 To explore the dynamics of ROS in  $\beta$ -cells *in vivo*, we pursued two methodologies to label and  
95 measure  $\beta$ -cell-specific roGFP2 signaling using intravital microscopy (Fig 2A). We utilized a syngeneic  
96 transplantation model, in which wild-type C57Bl/6J mouse islets infected *in vitro* with Ad-INS-Grx1-  
97 roGFP2 were transplanted under the kidney capsule of recipient mice. Once the labeled islets were  
98 identified under the kidney capsule, the mice were intravenously (IV) injected with saline, followed by  
99 80mg/kg alloxan monohydrate in saline (Figure 2B). Infusion of saline alone did not alter roGFP2  
100 signal, whereas infusion of alloxan resulted in a 2-fold increase in the roGFP2 ratio within 5 minutes.  
101 The signal then decreased over the next 15 minutes, presumably due to activation of the endogenous  
102 antioxidant response and mitigation of intracellular ROS within the transplanted islets.

103 While these studies demonstrated the utility of the Grx1-roGFP2 biosensor in transplanted

104 islets, we also wanted to develop a system to measure  $\beta$ -cell function *in situ* in the pancreas. To  
105 achieve this objective, we developed an adeno-associated virus serotype 8 (AAV8) containing INS-  
106 Grx1-roGFP2 (AAV8-INS-Grx1-roGFP2). AAV8 has pancreas tropism<sup>11</sup>, and when combined with the  
107 insulin promoter, the biosensor can be selectively expressed in endogenous  $\beta$ -cells (Fig S1A/B). In  
108 practice, the AAV8 could be injected into any animal model to be used for intravital imaging, without  
109 the need for lengthy breeding of transgenic mice expressing the biosensor in islet tissue. Therefore, to  
110 test the portability of our AAV8-packaged biosensor, we used a mouse model that would confer  
111 altered antioxidant response compared to WT mice. *Alox15* knockout mice (*Alox15*<sup>-/-</sup>) lack the 12/15-  
112 lipoxigenase enzyme, which we previously reported to confer protection against oxidative stress<sup>12</sup>. We  
113 hypothesized that this animal model would therefore exhibit altered kinetics of ROS dynamics in the  $\beta$ -  
114 cell that would correlate with changes in oxidative damage compared to WT controls. *Alox15*<sup>-/-</sup> and  
115 WT littermates were each administered a single intraperitoneal (IP) injection of AAV8-INS-Grx1-  
116 roGFP2 three weeks prior to intravital imaging to allow for biosensor expression. For imaging of ROS  
117 dynamics *in vivo*, labeled superficial islets were identified in the intact pancreas. The mice then  
118 received IV infusions of 80mg/kg alloxan. Consistent with our expectations, we observed a rapid 4.6-  
119 fold increase in biosensor signal ratio in WT mice, compared to a 3.3-fold increase in *Alox15*<sup>-/-</sup> mice  
120 (Fig 2C). Together, these data demonstrate that the intravital imaging of both  $\beta$ -cells transplanted  
121 under the kidney capsule and  $\beta$ -cells within the intact pancreas can be used to measure  $\beta$ -cell ROS  
122 dynamics *in vivo*.

123         While acute ROS dynamics can be predictive for  $\beta$ -cell damage, chronic changes leading to  
124 oxidative stress are more prominent during the pathogenesis of diabetes. To capture chronic,  
125 longitudinal changes, we implanted a modified version of a previously described abdominal imaging  
126 window (AIW) into WT mice<sup>13</sup>. AIWs provide a stable method to image the endogenous tissue on the  
127 time scale of days to weeks<sup>13</sup>, allowing stable imaging of the same region of pancreas over time.  
128 Thus, we used AIWs in AAV8-INS-Grx1-roGFP2-injected WT mice to visualize and measure  
129 longitudinal changes in  $\beta$ -cell ROS, as well as  $\beta$ -cell mass after exposure to the selective  $\beta$ -cell toxin  
130 streptozotocin (STZ) (Fig 3A). Animals were administered 5 daily, single injections of 55 mg/kg STZ

131 (the multiple low-dose STZ, or MLD-STZ challenge). MLD-STZ is a well-characterized  
132 pharmacological model to induce diabetes, where hyperglycemia develops within days after the last  
133 STZ injection, and is associated with reduced  $\beta$ -cell mass due to apoptosis<sup>14,15</sup>. Figure 3B shows an  
134 example of a pancreas window preparation, demonstrating that stable positioning is obtained within  
135 ~8 days of window placement, and is maintained for an additional 24 days. The addition of STZ did  
136 not cause a noticeable change to the overall appearance of the tissue for the duration of longitudinal  
137 imaging. Baseline microscopy images were collected 11 days after window implantation, prior to  
138 beginning the MLD-STZ challenge (Fig 3C). STZ injections were administered in the afternoon, while  
139 the imaging was completed in the morning to avoid measuring acute effects of the drug, but instead to  
140 measure the chronic effects on ROS that persist over time. Images were collected sequentially from  
141 the same islet before, during, and up to 17 days after MLD-STZ (Fig 3C).

142         Representative z-planes demonstrate that while the same islet was imaged over time, the islet  
143 architecture changed dramatically in response to STZ. We used second harmonic generation from  
144 collagen to verify that we were returning to the same islet during each imaging session (Fig S2).  
145 Consistent with previous reports<sup>14,15</sup>, MLD-STZ resulted in elevated blood glucose levels by 3 days  
146 post-treatment and overt hyperglycemia was observed by 17 days post treatment (Fig 3D). We  
147 measured the largest x/y area and observed a rapid 50% reduction in the islet area by the end of STZ  
148 treatment, which then stabilized at ~35% of the initial area by 10-days post-treatment (Fig 3E). At the  
149 end of intravital studies, animals were euthanized and pancreata were fixed for additional end-point  
150 analysis using immunohistochemistry and immunofluorescence to confirm loss of islet area (Fig S3).

151         The reduced islet area and increased blood glucose levels after MLD-STZ are indicative of  $\beta$ -  
152 cell ablation. In order to collect data from islets through the AIW deep within the pancreas, we utilized  
153 multi-photon microscopy and sequential 800nm and 900nm excitation of Grx1-roGFP2. While the  
154 dynamic range of roGFPs is less using two-photon excitation<sup>16</sup>, Grx1-roGFP2 ratios measured  
155 from the imaged  $\beta$ -cells show that there is an elevated biosensor signal during STZ administration  
156 (Fig 3F). This effect subsides ~13 days after MLD-STZ has ended and occurs in conjunction with the  
157 stabilization of islet area. The somewhat muted response of the roGFP2 sensor is likely to reflect the

158 fact that measurements are obtained from the subpopulation of cells that have been able to resist STZ  
159 ablation. We have replicated these results in additional mice to demonstrate the uniformity of the STZ  
160 ablation compared to unchanging saline-treated controls (Fig 4).

161

## 162 **Discussion:**

163 We have demonstrated the application of a ROS biosensor within the context of  $\beta$ -cell biology.  
164 The use of Grx1-roGFP2 in  $\beta$ -cells both *in vitro* and *in vivo* enables acute and chronic measurements  
165 of ROS regulation. These data offer a stepping stone to more complex analysis focused on  
166 determining why specific cell populations and subpopulations are more susceptible to ROS. With the  
167 ability to measure acute ROS dynamics, we may also begin to tease apart inter- and intra-islet  
168 differences in oxidative stress susceptibility between mouse and human  $\beta$ -cells<sup>17</sup>. While the  
169 pathophysiology of  $\beta$ -cell oxidative stress continues to be elucidated, other known signaling pathways,  
170 including calcium signaling, are also critical to  $\beta$ -cell function and survival in diabetes<sup>18</sup>. With this in  
171 mind, the adeno- and AAV- applications have been designed to permit the easy substitution of  
172 biosensors for other pathways of interest (e.g. GCaMP or Twitch for calcium). Furthermore, these  
173 virally-packaged biosensors can be utilized in virtually any mouse model without lengthy breeding, or  
174 may also be used in human islets transplanted into mice.

175 While there are moderate differences in alloxan stimulation between transplanted and  
176 endogenous  $\beta$ -cells likely caused by the stress of transplantation and/or efficiency of graft  
177 vascularization, our intravital microscopy data from biosensor-labeled  $\beta$ -cells demonstrate the  
178 importance of acute dynamics in cellular responses to stimuli. However, chronic changes in oxidative  
179 stress may be more indicative of normal diabetes progression. With the use of AIW's, we demonstrate  
180 that longitudinal imaging of biosensor-labeled  $\beta$ -cells can yield a robust data set, including both  
181 physiological and cellular measurements, which can be chronologically interpreted to generate a  
182 sequence of events during STZ-induced diabetes. Here we are able to observe that blood glucose  
183 levels inversely correlated with islet area and that the glucose values are delayed in chronology,  
184 suggesting that remaining  $\beta$ -cells are partially able to compensate for the loss in mass up to a "tipping

185 point<sup>19</sup>. This experimental platform has yielded an unprecedented data set of longitudinal cellular  
186 measurements collected from biosensor-labeled  $\beta$ -cells *in situ* during  $\beta$ -cell death. This approach  
187 could also easily be adapted to more targeted models of diabetes such as the *db/db* or non-obese  
188 diabetic (NOD) mice. In conclusion, our highly-portable experimental platform, comprised of virally-  
189 packaged biosensor and AIW's, thus facilitate the unparalleled interrogation of *in vivo*  $\beta$ -cell biology.  
190 The longitudinal approach truly opens a new realm of *in vivo* experimentation in islet structure and  
191 function within the context of steady-state drug treatments,  $\beta$ -cell replication or death, and diabetes  
192 progression.

193

#### 194 **Methods:**

195 **Islet Isolation:** Male and female C57BL/6J mice were purchased from Jackson Labs at 8 weeks of  
196 age and utilized in both *in vitro* assays and islet transplant studies at 8-14 weeks of age. 20 week-old  
197 female mice expressing an insulin-promoter driven ROSA26 nuclear H2B-mCherry<sup>10</sup> were utilized for  
198 mCherry colocalization studies. Mice were euthanized, pancreas harvested, and islets were liberated  
199 using a 0.3% collagenase digestion in 37°C shaking water bath in Hanks buffered sodium salt. Islets  
200 were maintained in islet media containing phenol free RPMI 1640, with 10% FBS, 100U/ml Penicillin,  
201 100ug/ml Streptomycin, and 8mM glucose. Islets were allowed to recover over-night prior to any  
202 subsequent experiments.

203

204 **Virus Generation:** Adeno- and adeno-associated viruses (AAV) were generated using VectorBuilder  
205 (Cyagen Biosciences). Briefly, the custom  $\beta$ -cell specific promoter contained 414 base pairs of the rat  
206 insulin-1 promoter, along with 691 basepairs of the rabbit beta-globin intron<sup>9</sup>. This promoter and Grx1-  
207 roGFP2<sup>6</sup> sequences were de novo synthesized and cloned into the necessary adeno- or AAV-  
208 expression vectors for viral production.

209

210 ***In Vitro* Islet Infection, Treatment and Imaging:** To infect  $\beta$ -cells *in vitro*, isolated islets were  
211 washed with Dulbecco's phosphate buffered saline without calcium or magnesium, followed by



212 distention with Accutase (Sigma) at 37°C for 30 seconds. Accutase was rapidly inactivated with room  
213 temperature islet media, then washed with fresh islet media. Adenovirus was added directly to islet  
214 media to achieve approximately  $2 \times 10^7$  viral particles per 100 islets. Viral infection lasted at least 6  
215 hours prior to image or transplant the following day. After viral infection, islets were placed in fresh  
216 islet media with varying glucose concentrations (2, 8, 16.7, and 25 mM) for either 4 or 16 (overnight)  
217 hours. Islets were imaged *in vitro* imaging using a Zeiss LSM 800 (40x/1.2 NA/Water Objective)  
218 equipped with an Ibidi Stage Top Incubation system (5% CO<sub>2</sub>, 37°C, 85% Humidity). Grx1-roGFP2  
219 was sequentially excited with 405 and 488 nm lasers at a 3:1 power ratio, with emissions collected  
220 from 490-600 nm. Alloxan monohydrate (Sigma) was resuspended in islet media at 4mM immediately  
221 prior to the start of imaging.

222

223 **Islet Transplants:** Adeno-infected islets were transplanted into anesthetized recipient mice via sub-  
224 renal capsular injection under aseptic conditions. Mice were anesthetized with isoflurane. The left  
225 lumbar region received a single skin incision to expose the kidney. A small entry hole (~1mm  
226 diameter) was made in the kidney capsule with a jeweler forceps and islets were gently released into  
227 the subcapsular space through a small piece of sterile polyethylene tubing attached to a syringe. The  
228 renal capsule was allowed to close by secondary intention, the body wall and skin incision were  
229 closed using monofilament 4.0 silk sutures, and the mice were allowed to recover. Analgesics were  
230 administered for pain relief. The mice were singly housed post-surgery. Islet transplants were allowed  
231 to engraft 14 days prior to intravital imaging.

232

233 **End-point Kidney Transplant and Pancreas Intravital Imaging:** Mice for kidney capsule islet  
234 transplant or pancreas imaging were anesthetized with isoflurane on the day of imaging. The mouse  
235 was placed in the right lateral decubitus position and a small, 1 cm vertical incision was made along  
236 the left flank at the level of the left kidney or over the pancreas. The exposed organ was orientated so  
237 that the organ was underneath the animal for imaging with an inverted Leica SP8 confocal  
238 microscope. The animal's temperature was maintained via a circulating water bath blanket, a second

239 warmer for the stage and heating elements for the objective to diminish the heat sink at the level of  
240 the objective tissue interface. A rectal thermometer was in place to keep a continuous read out on the  
241 mouse's core body temperature. Intravenous access was achieved using the placement of a jugular  
242 catheter or by tail vein injection. Images were captured using a Leica SP8 (25x/0.95NA/Water  
243 immersion objective) with 405 and 488 nm lasers at an 8:1 power ratio, with emissions collected from  
244 490-600 nm. Alloxan monohydrate (Sigma) was resuspended in sterile saline at 80 mg/kg  
245 immediately prior to the IV injection and imaging.

246

247 ***In Vivo* Islet Infection:** To infect  $\beta$ -cells *in vivo*, AAV8-INS-Grx1-roGFP2 was injected  
248 intraperitoneally 14-21 days prior to intravital imaging or 8 days prior to AIW surgery. Mice were given  
249 a dose of  $2-2.5 \times 10^{11}$  viral particles.

250

251 **Abdominal Imaging Window (AIW) Procedure:** A general abdominal imaging window (AIW)  
252 procedure has been published previously<sup>13</sup>. We adapted the protocol to be successful over the  
253 pancreas. The animals were anesthetized via isoflurane and All procedures were performed under  
254 aseptic conditions. Warm sterile saline (1 ml) was injected subcutaneously to aid in fluid replacement  
255 post procedure. A vertical left flank incision was performed approximately 1.5cm in length. The  
256 pancreas was identified and externalized utilizing cotton tipped applicators. A purse-string suture  
257 (non-absorbable monofilament) was placed around the incision through both the fascial and the skin  
258 layers. Each suture was approximately 0.5cm apart from the next and at least 0.1cm from the edge of  
259 the incision. Cyanoacrylate adhesive was applied to the interior of the underside of the outer ring and  
260 then it was placed on the pancreas. Mild pressure was applied for approximately 5 minutes to ensure  
261 that the ring adhered to the pancreas. The inner ring with attached coverslip was then placed into the  
262 outer ring and contact with the organ of interest was visually confirmed. The skin and fascial edges  
263 were then placed into the groove of the AIW and the purse string suture was secured with at least 4  
264 square knots. This effectively closed off the abdominal cavity and left the organ of interest in contact  
265 with the coverslip. Once the AIW was in place the mouse was allowed to emerge from anesthesia and

266 placed in a recovery cage on a warming blanket with soft bedding.

267

268 **Intravital for AIW Imaging:** Mice with AIW's were anesthetized with isoflurane for no longer than 30  
269 minutes for imaging of labeled islets. Mice received 200uL of sterile saline to prevent dehydration.  
270 Images were captured using a Leica SP8 (25x/0.95NA/Water Objective) equipped with a multiphoton  
271 MaiTai Ti-Sapphire 2-photon laser. Z-stacks were sequentially collected using 800 and 900 nm  
272 excitation (1:1 power ratio) and a green emission filter (520-580nm). At the end of imaging, duplicated  
273 blood glucose readings from a tail nick were measured using an AlphaTrack2 glucometer and test  
274 strips. Mice were allowed to recover prior to returning to animal housing.

275

276 **Pancreas Recovery, Sectioning, and Staining after AIW:** At the end of intravital study, the  
277 pancreas was recovered via pancreatectomy and fixed in 4% PFA at room temperature for 4 hours.  
278 The pancreas was then dehydrated in 70% ethanol overnight. The pancreas was embedded in  
279 paraffin and sectioned for subsequent staining analyses. Pancreata were stained for  
280 immunofluorescence using anti-insulin antibody (A0564, Dako; 1;500) and Alexa Fluor 488 anti-  
281 Guinea pig antibody (Invitrogen). Immunofluorescence images were collected using a Zeiss LSM 700  
282 (40x/1.3NA oil immersion objective). Immunohistochemistry was performed using anti-insulin antibody  
283 (3014, Cell Signaling, 1:400) and anti-Rabbit ImmPRESS HRP reagent kit (MP-7401, Vector labs)  
284 then developed using DAB peroxidase Substrate kit (SK-4100, Vector labs). Immunohistochemistry  
285 images were acquired using a Zeiss AxioScan with an Orca ER CCD camera.

286

287 **Data Analysis and Image Presentation:** Background subtracted, raw images were analyzed using  
288 ImageJ (NIH) or Cell Profiler<sup>20</sup>. Intensity of the 405nm-based emission was divided by 488nm-based  
289 emission to create a raw Grx1-roGFP2 ratio. Ratiometric images were created using Cell Profiler and  
290 rescaled to an arbitrary linear look-up table that fit all data points within that experimental data set.  
291 The Cell Profiler Pipeline script is available in the supplemental data. To determine islet area, the x/y  
292 plane with the largest GFP+ cell area was outlined and measured using ImageJ. Images presented in

293 figures were linearly scaled for display purposes only. For statistical testing, Student's t-tests and 1-  
294 way ANOVAs were used.

295

#### 296 **Acknowledgements:**

297 This research was performed using resources and/or funding provided by National Institutes of Health  
298 grants K01 DK102492 (to AKL), R03 DK115990 (to AKL), R01 DK60581 and R01 DK105588 (both to  
299 RGM), T32 KD0604466 (to CAR), and Human Islet Research Network UC4 DK104162 (to AKL;  
300 RRID:SCR\_014393), along with startup funds from Indiana University School of Medicine and the  
301 Herman B Wells Center for Pediatric Research (to AKL). This study utilized Diabetes Center core  
302 resources supported by National Institutes of Health grant P30 DK097512 (to Indiana University). We  
303 would like to thank the Indiana O'Brien Center for Advanced Microscopy Analysis for the generous  
304 sharing of AIW-related resources. We also thank Mark Soompa for the fabrication of our stage-  
305 window adapter and window accessories. We would also like to acknowledge the highly skilled  
306 individuals providing services through the Indiana Center for Biological Microscopy and IU School of  
307 Medicine Islet Core.

308

#### 309 **Contributions:**

310 CAR, AT, and AC contributed to data collection and data analysis. CAR, KO, MM, GM, and ST  
311 contributed to animal protocols, surgeries, and handling. CAR, RD, ST, KD, RM, and AKL contributed  
312 to experimental design, technical oversight, and interpretation of data. CAR and AKL contributed to  
313 drafting and writing of the manuscript. All authors contributed to the review and revision of the  
314 manuscript.

315

316 **Data Availability:** The authors declare that all data supporting the findings of this study are available  
317 within the paper and its supplementary information files.

318 **Figure Legends:**

319 **Figure 1: In Vitro Characterization of Adeno-INS-Grx1-roGFP2**

320 (A) Adeno-INS-Grx1-roGFP2 infected primary islets from C57Bl/6J mice were incubated for 4 hours  
321 with islet media containing 2, 8, 16.7, or 25 mM glucose. Emissions (490-600nm) were collected from  
322 sequential 405 and 488 nm excitation. (B) Similar to A, except islets were incubated for 16 hours with  
323 islet media containing 2, 8, 16.7, or 25 mM glucose then imaged. (C) Representative ratiometric  
324 images generated from islets after 16 hours glucose incubations. (D) Adeno-INS-Grx1-roGFP2  
325 infected mouse islets incubated for 4 hours with islet media containing 2, 8, 16.7, or 25 mM glucose  
326 (filled black) were then imaged after 5 minutes of stimulation with 4mM alloxan monohydrate (hollow  
327 grey). (E) Data from (D) were replotted as a fold change relative to the baseline ratio for each mouse.  
328 Data are means  $\pm$ SEM. (N  $\geq$  3 mice; >4 islets per mouse; p<0.05).

329

330 **Figure 2: Intravital Microscopy Applications of Adeno- and AAV8- INS-Grx1-roGFP2**

331 (A) Schematic depiction of the two methodologies for imaging of biosensor-labeled  $\beta$ -cells using  
332 intravital microscopy. Method #1 utilizes adenoviral labeling of isolated primary mouse islets, followed  
333 by transplantation under the mouse kidney capsule. Method #2 uses intraperitoneal (IP) injection of  
334 adeno-associated virus serotype 8 (AAV8) packaged biosensor to label endogenous  $\beta$ -cells. Mice are  
335 anesthetized using continuous isoflurane inhalation and placed on a heated stage where the imaging  
336 objective reaches the exposed kidney or pancreas from below. A jugular catheter is used to  
337 administer drugs intravenously. (B) Representative ratiometric images of Grx1-roGFP2 changes in  $\beta$ -  
338 cells within the islet transplant under the kidney capsule at baseline, 5 minutes after IV saline  
339 injection, and 5 and 15 minutes after IV injection of 80 mg/kg alloxan monohydrate. (C) Fold change  
340 over baseline in  $\beta$ -cell-specific Grx1-roGFP2 from 3 mice after 5 minutes after IV saline injection, and  
341 5 and 15 minutes after IV injection of 80 mg/kg alloxan monohydrate. Data are means  $\pm$ SEM. (N=3,  
342 p<0.05). (D) Representative ratiometric images of Grx1-roGFP2 changes in  $\beta$ -cells of WT and *Allox15*<sup>-/-</sup>  
343 mice within the endogenous pancreas at 5 minutes after IV injection of 85 mg/kg alloxan  
344 monohydrate. (E) Fold change over baseline in Grx1-roGFP2 signal from *in situ*  $\beta$ -cells in the

345 pancreata of WT (black) and *Alox15<sup>-/-</sup>* (grey) mice over 30 minutes post IV injection of alloxan. (F)  
346 Fold change over baseline in Grx1-roGFP2 signal at 5 minutes post IV injection of alloxan.

347

348 **Figure 3: Longitudinal Imaging of AAV8-INS-Grx1-roGFP2 using Abdominal Imaging Windows**  
349 **after Multi-low Dose STZ**

350 (A) Schematic of AAV8-INS-Grx1-roGFP2, abdominal imaging window (AIW), and multi-low-dose  
351 streptozotocin (MLD-STZ; 55mg/kg/day) experiment. Intraperitoneal injection of AAV8-packaged  
352 biosensor occurred 6 days prior to AIW surgery (day 0). Baseline images were collected in the  
353 morning of day 11 and MLD-STZ started in the afternoon of day 11. MLD-STZ continued for 5 days  
354 while imaging continued until the window integrity was compromised at Day 32. The pancreas was  
355 recovered and fixed for endpoint analyses. (B) Representative widefield images of the pancreas as  
356 seen through the AIW over time. Above each image is the day post AIW implantation. Below each  
357 image is the corresponding day in relation to MLD-STZ challenge. (C) Representative images of a  
358 single z-plane within an imaged islet at baseline, day 4 of MLD-STZ, day 10 post-STZ, day 13 post-  
359 STZ, and day 17 post-STZ. The white dotted line indicates the largest x/y islet area at baseline. The  
360 yellow dotted line highlights a similar region of moderately stable cells that aided in aligning z-planes  
361 over time. The red dotted line shows the final, largest x/y islet area 17 days after MLD-STZ challenge.  
362 (D) Representative blood glucose collected 30 minutes after start of anesthesia for each imaging  
363 session. (E) Islet area calculated for the largest x/y plane (black dotted line) before, during, and after  
364 MLD-STZ challenge. (F) Ratiometric data (black dotted line) from AAV8-INS-Grx1-roGFP2-labeled  $\beta$ -  
365 cells using 800/900 nm 2-photon excitation before, during, and after MLD-STZ challenge.

366

367 **Figure 4: Longitudinal Imaging of AAV8-INS-Grx1-roGFP2 using Abdominal Imaging Windows**  
368 **after Multi-low Dose STZ or Saline**

369 (A) Representative slices from z-stacks of the same islet pre-STZ, 3 days during STZ treatment, 7 and  
370 10 days post-STZ treatment for Mouse B. The white dotted light highlights the starting islet area, while  
371 the red dotted line shows the islet area of that day's imaging. (B) Representative slices from z-stacks

372 of the same islet pre-saline, 3 days during Saline treatment, and 3 days post-saline treatment for  
373 Mouse C. The white dotted light highlights the starting islet area, while the red dotted line shows the  
374 islet area of that day's imaging. (C) Blood glucose was collected 30 minutes into anesthesia for each  
375 imaging session. Mouse A (black circles) and B (red squares) received STZ, while Mouse C (gray  
376 triangles) and D (black triangles) received saline injections. (D) Body weight (in grams) of mice that  
377 had undergone AIW study. (E) Islet area calculated for the largest x/y plane for 3 individual islets for  
378 Mouse B before, during, and after MLD-STZ challenge. (F) Ratiometric data the 3 individual islets  
379 from Mouse B using AAV8-INS-Grx1-roGFP2-labeled  $\beta$ -cells after 800/900 nm 2-photon excitation  
380 before, during, and after MLD-STZ challenge. (G) Aggregated islet area data from Mouse A (black  
381 circles), B (red squares), C (gray triangles), and D (black triangles) before, during, and after STZ or  
382 saline injections. (H) Ratiometric data from Mouse A (black circles), B (red squares), C (gray  
383 triangles), and D (black triangles) before, during, and after STZ or saline injections in AAV8-INS-Grx1-  
384 roGFP2-labeled  $\beta$ -cells after 800/900 nm 2-photon excitation before, during, and after MLD-STZ  
385 challenge.

386

387 **Figure S1: Colocalization of Adeno- and AAV8- INS-Grx1-roGFP2 *in vitro* and *in vivo***

388 (A) Isolated islets from mice expressing an insulin-promoter driven ROSA26 nuclear H2B-mCherry  
389 were infected with Adeno-INS-Grx1-roGFP2 and imaged using a Zeiss LSM 800 confocal (Green –  
390 roGFP2, Red – mCherry). While not all  $\beta$ -cells are infected and express biosensor, all cells that are  
391 expressing roGFP2 are mCherry positive. (B) WT mice were IP injected with AAV8-INS-Grx1-roGFP2  
392 3 weeks prior to pancreatectomy, paraffin-embedding, sectioning, and staining. An anti-GFP (to stain  
393 roGFP2) and anti-insulin antibodies were used to determine the localization of roGFP2 expression in  
394 heart, kidney, liver, and pancreas. (C) Islets were isolated from WT mice IP injected with AAV8-INS-  
395 Grx1-roGFP2 3 weeks prior. The islets were dispersed and stained as in (B) and imaged. While  
396 AAV8-INS-Grx1-roGFP2 does not label all insulin-positive cells, all GFP-positive cells are also insulin  
397 positive. (D) Islets isolated from WT mice were infected with Adeno-INS-Grx1-roGFP2 and treated  
398 with 1 and 16.7 mM glucose for 30 minutes. RoGFP2 ratios were collected before and after treatment,

399 however, no changes in biosensor signal were observed. Data are means  $\pm$ SEM (N=3 mice, >3 islets  
400 per mouse).

401

402 **Figure S2: Second Harmonics Act as a Fiduciary Marker**

403 Second harmonic generation from collagen was used as a fiduciary marker to return to islets between  
404 imaging sessions. Between days 11 and 14, the islet of interest is highlighted in white, while a unique  
405 collagen structure is highlighted in red.

406

407 **Figure S3: Endpoint Analysis of Pancreata after AIW Study**

408 (A) Representative images of immunohistochemical images of pancreata from the pancreas of Mouse  
409 A-D. (B) Representative images of immunofluorescence images (DAPI – Blue, Insulin – Green) of  
410 islets from pancreata from Mouse A-D.

411

412

413

414



415 **References:**

- 416 1. Daoud, J., Rosenberg, L. & Tabrizian, M. Pancreatic islet culture and preservation strategies:  
417 advances, challenges, and future outlook. *Cell Transplant.* **19**, 1523–1535 (2010).
- 418 2. Coppieters, K., Amirian, N. & von Herrath, M. Intravital imaging of CTLs killing islet cells in  
419 diabetic mice. *J. Clin. Invest.* **122**, 119–131 (2012).
- 420 3. Zhu, S. *et al.* Monitoring C-Peptide Storage and Secretion in Islet  $\beta$ -Cells In Vitro and In Vivo.  
421 *Diabetes* **65**, 699–709 (2016).
- 422 4. Skyler, J. S. *et al.* Differentiation of Diabetes by Pathophysiology, Natural History, and Prognosis.  
423 *Diabetes* **66**, 241–255 (2017).
- 424 5. Tersey, S. A. *et al.* Minireview: 12-Lipoxygenase and Islet  $\beta$ -Cell Dysfunction in Diabetes. *Mol.*  
425 *Endocrinol. Baltim. Md* **29**, 791–800 (2015).
- 426 6. Gutschner, M. *et al.* Real-time imaging of the intracellular glutathione redox potential. *Nat. Methods*  
427 **5**, 553–559 (2008).
- 428 7. Sifuentes-Franco, S., Pacheco-Moisés, F. P., Rodríguez-Carrizalez, A. D. & Miranda-Díaz, A. G.  
429 The Role of Oxidative Stress, Mitochondrial Function, and Autophagy in Diabetic Polyneuropathy.  
430 *J. Diabetes Res.* **2017**, (2017).
- 431 8. Zorov, D. B., Juhaszova, M. & Sollott, S. J. Mitochondrial Reactive Oxygen Species (ROS) and  
432 ROS-Induced ROS Release. *Physiol. Rev.* **94**, 909–950 (2014).
- 433 9. Ravier, M. A. *et al.* Mechanisms of Control of the Free  $\text{Ca}^{2+}$  Concentration in the Endoplasmic  
434 Reticulum of Mouse Pancreatic  $\beta$ -Cells. *Diabetes* **60**, 2533–2545 (2011).
- 435 10. Benner, C. *et al.* The transcriptional landscape of mouse beta cells compared to human beta cells  
436 reveals notable species differences in long non-coding RNA and protein-coding gene expression.  
437 *BMC Genomics* **15**, 620 (2014).
- 438 11. Wang, Z. *et al.* Widespread and stable pancreatic gene transfer by adeno-associated virus  
439 vectors via different routes. *Diabetes* **55**, 875–884 (2006).
- 440 12. Tersey, S. A. *et al.* 12-Lipoxygenase Promotes Obesity-Induced Oxidative Stress in Pancreatic  
441 Islets. *Mol. Cell. Biol.* **34**, 3735–3745 (2014).

- 442 13. Ritsma, L. *et al.* Surgical implantation of an abdominal imaging window for intravital microscopy.  
443 *Nat. Protoc.* **8**, 583–594 (2013).
- 444 14. McEvoy, R. C., Andersson, J., Sandler, S. & Hellerström, C. Multiple low-dose streptozotocin-  
445 induced diabetes in the mouse. Evidence for stimulation of a cytotoxic cellular immune response  
446 against an insulin-producing beta cell line. *J. Clin. Invest.* **74**, 715–722 (1984).
- 447 15. Bolzán, A. D. & Bianchi, M. S. Genotoxicity of Streptozotocin. *Mutat. Res. Mutat. Res.* **512**, 121–  
448 134 (2002).
- 449 16. Redox Indicator Mice Stably Expressing Genetically Encoded Neuronal roGFP: Versatile Tools to  
450 Decipher Subcellular Redox Dynamics in Neuropathophysiology. Available at:  
451 <https://www.ncbi.nlm.nih.gov/pmc/articles/PMC4931743/>. (Accessed: 10th October 2018)
- 452 17. Gerber, P. A. & Rutter, G. A. The Role of Oxidative Stress and Hypoxia in Pancreatic Beta-Cell  
453 Dysfunction in Diabetes Mellitus. *Antioxid. Redox Signal.* **26**, 501–518 (2017).
- 454 18. Gilon, P., Chae, H.-Y., Rutter, G. A. & Ravier, M. A. Calcium signaling in pancreatic  $\beta$ -cells in  
455 health and in Type 2 diabetes. *Cell Calcium* **56**, 340–361 (2014).
- 456 19. Weir, G. C. & Bonner-Weir, S. Five Stages of Evolving Beta-Cell Dysfunction During Progression  
457 to Diabetes. *Diabetes* **53**, S16–S21 (2004).
- 458 20. Kamentsky, L. *et al.* Improved structure, function and compatibility for CellProfiler: modular high-  
459 throughput image analysis software. *Bioinforma. Oxf. Engl.* **27**, 1179–1180 (2011).

460

461

462

Figure 1

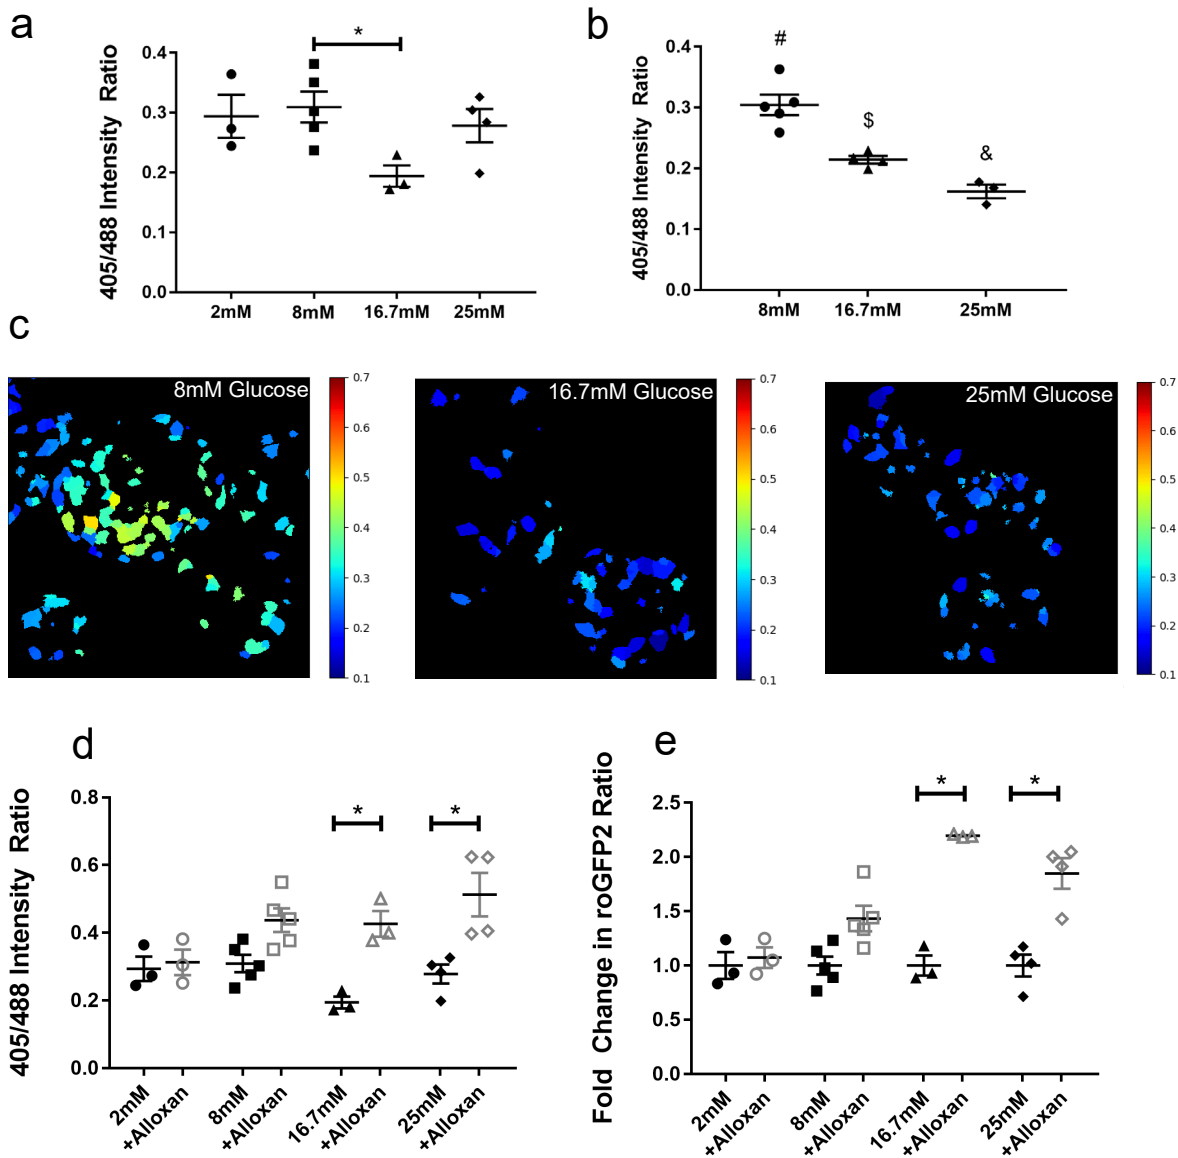

463

464

465

466

467

468

469

470

471

472

473

474

### Figure 1: In Vitro Characterization of Adeno-INS-Grx1-roGFP2

(A) Adeno-INS-Grx1-roGFP2 infected primary islets from C57Bl/6J mice were incubated for 4 hours with islet media containing 2, 8, 16.7, or 25 mM glucose. Emissions (490-600nm) were collected from sequential 405 and 488 nm excitation. (B) Similar to A, except islets were incubated for 16 hours with islet media containing 2, 8, 16.7, or 25 mM glucose then imaged. (C) Representative ratiometric images generated from islets after 16 hours glucose incubations. (D) Adeno-INS-Grx1-roGFP2 infected mouse islets incubated for 4 hours with islet media containing 2, 8, 16.7, or 25 mM glucose (filled black) were then imaged after 5 minutes of stimulation with 4mM alloxan monohydrate (hollow grey). (E) Data from (D) were replotted as a fold change relative to the baseline ratio for each mouse. Data are means  $\pm$ SEM. (N  $\geq$  3 mice; >4 islets per mouse;  $p < 0.05$ ).

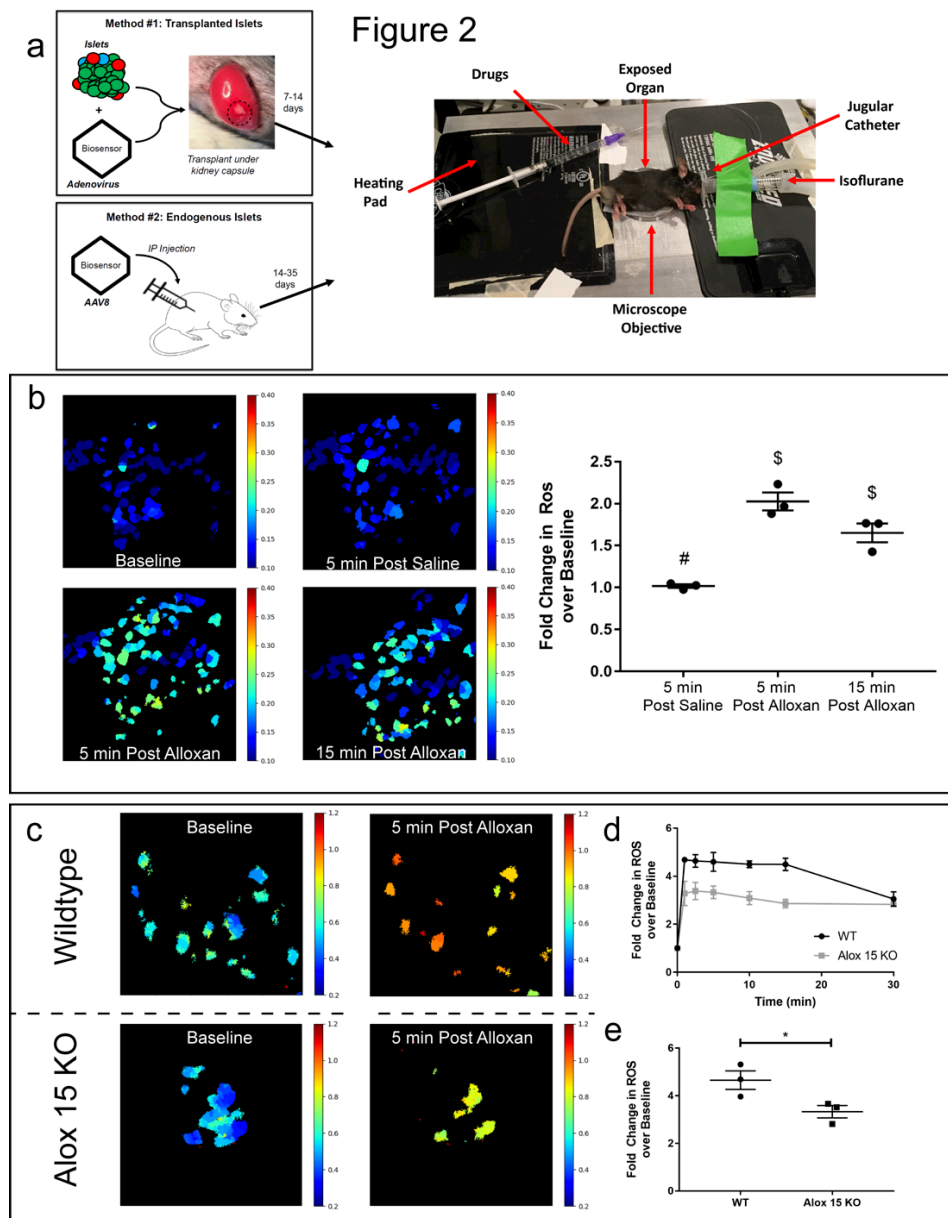

475  
476  
477  
478  
479  
480  
481  
482  
483  
484  
485  
486  
487  
488  
489  
490  
491  
492

**Figure 2: Intravital Microscopy Applications of Adeno- and AAV8- INS-Grx1-roGFP2**

(A) Schematic depiction of the two methodologies for imaging of biosensor-labeled  $\beta$ -cells using intravital microscopy. Method #1 utilizes adenoviral labeling of isolated primary mouse islets, followed by transplantation under the mouse kidney capsule. Method #2 uses intraperitoneal (IP) injection of adeno-associated virus serotype 8 (AAV8) packaged biosensor to label endogenous  $\beta$ -cells. Mice are anesthetized using continuous isoflurane inhalation and placed on a heated stage where the imaging objective reaches the exposed kidney or pancreas from below. A jugular catheter is used to administer drugs intravenously. (B) Representative ratiometric images of Grx1-roGFP2 changes in  $\beta$ -cells within the islet transplant under the kidney capsule at baseline, 5 minutes after IV saline injection, and 5 and 15 minutes after IV injection of 80 mg/kg alloxan monohydrate. (C) Fold change over baseline in  $\beta$ -cell-specific Grx1-roGFP2 from 3 mice after 5 minutes after IV saline injection, and 5 and 15 minutes after IV injection of 80 mg/kg alloxan monohydrate. Data are means  $\pm$  SEM. (N=3,  $p < 0.05$ ). (D) Representative ratiometric images of Grx1-roGFP2 changes in  $\beta$ -cells of WT and *Alox15*<sup>-/-</sup> mice within the endogenous pancreas at 5 minutes after IV injection of 85 mg/kg alloxan monohydrate. (E) Fold change over baseline in Grx1-roGFP2 signal from *in situ*  $\beta$ -cells in the pancreata of WT (black) and *Alox15*<sup>-/-</sup> (grey) mice over 30 minutes post IV injection of alloxan. (F) Fold change over baseline in Grx1-roGFP2 signal at 5 minutes post IV injection of alloxan.

Figure 3

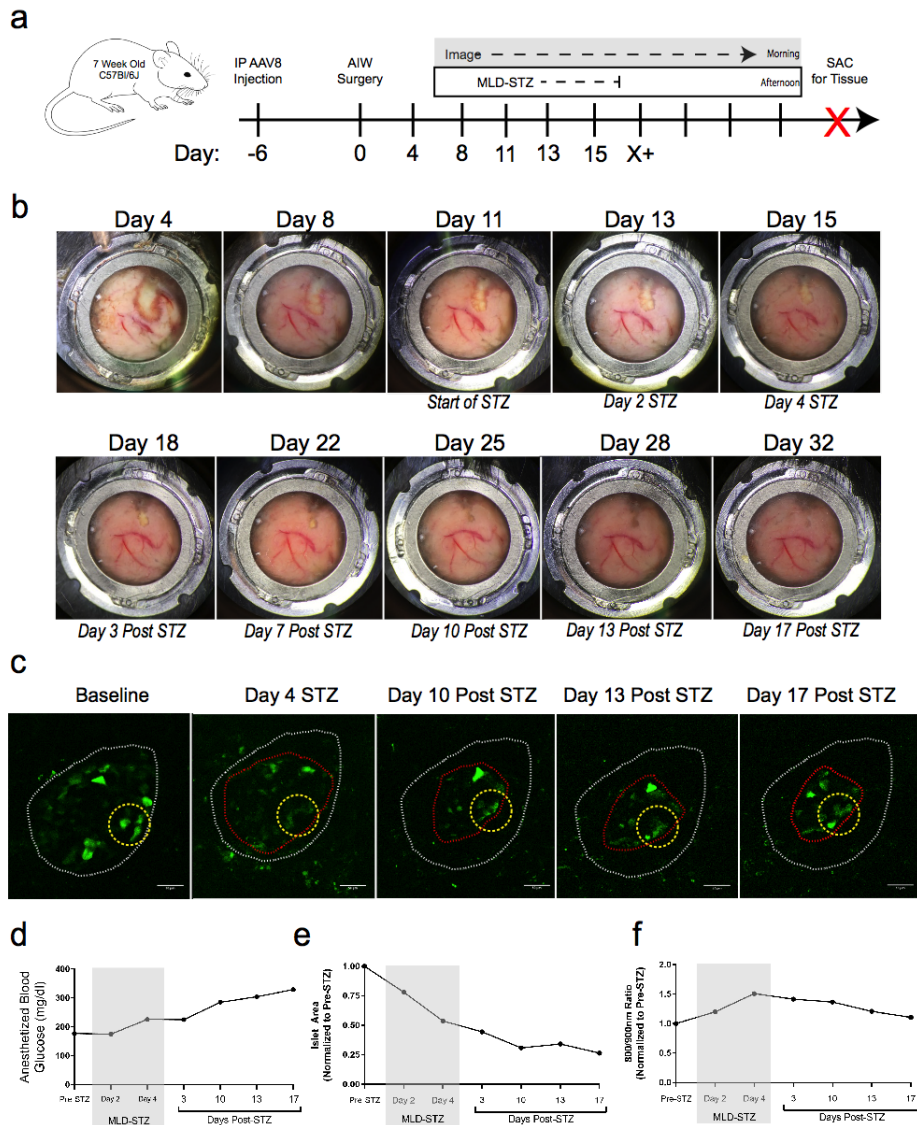

493

494

495

496

497

498

499

500

501

502

503

504

505

506

507

508

509

510

511

**Figure 3: Longitudinal Imaging of AAV8-INS-Grx1-roGFP2 using Abdominal Imaging Windows after Multi-low Dose STZ**

(A) Schematic of AAV8-INS-Grx1-roGFP2, abdominal imaging window (AIW), and multi-low-dose streptozotocin (MLD-STZ; 55mg/kg/day) experiment. Intraperitoneal injection of AAV8-packaged biosensor occurred 6 days prior to AIW surgery (day 0). Baseline images were collected in the morning of day 11 and MLD-STZ started in the afternoon of day 11. MLD-STZ continued for 5 days while imaging continued until the window integrity was compromised at Day 32. The pancreas was recovered and fixed for endpoint analyses. (B) Representative widefield images of the pancreas as seen through the AIW over time. Above each image is the day post AIW implantation. Below each image is the corresponding day in relation to MLD-STZ challenge. (C) Representative images of a single z-plane within an imaged islet at baseline, day 4 of MLD-STZ, day 10 post-STZ, day 13 post-STZ, and day 17 post-STZ. The white dotted line indicates the largest x/y islet area at baseline. The yellow dotted line highlights a similar region of moderately stable cells that aided in aligning z-planes over time. The red dotted line shows the final, largest x/y islet area 17 days after MLD-STZ challenge. (D) Representative blood glucose collected 30 minutes after start of anesthesia for each imaging session. (E) Islet area calculated for the largest x/y plane (black dotted line) before, during, and after MLD-STZ challenge. (F) Ratiometric data (black dotted line) from AAV8-INS-Grx1-roGFP2-labeled  $\beta$ -cells using 800/900 nm 2-photon excitation before, during, and after MLD-STZ challenge.

Figure 4

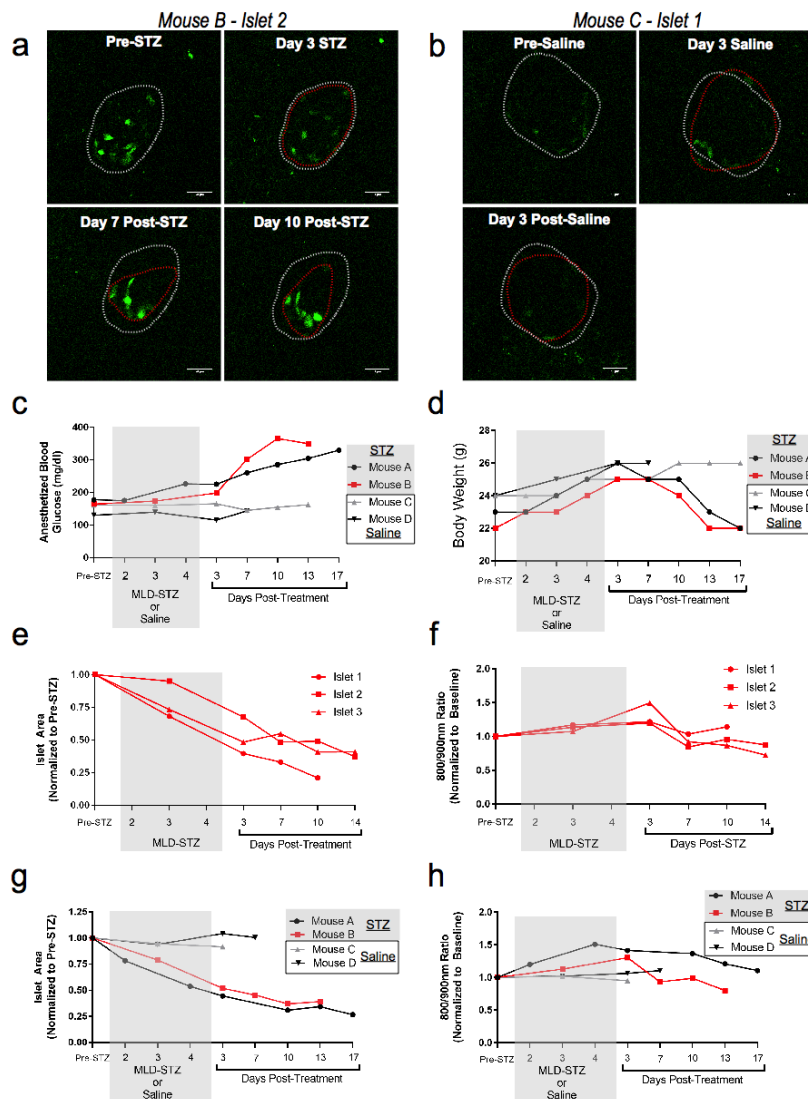

**Figure 4: Longitudinal Imaging of AAV8-INS-Grx1-roGFP2 using Abdominal Imaging Windows after Multi-low Dose STZ or Saline**

(A) Representative slices from z-stacks of the same islet pre-STZ, 3 days during STZ treatment, 7 and 10 days post-STZ treatment for Mouse B. The white dotted light highlights the starting islet area, while the red dotted line shows the islet area of that day's imaging. (B) Representative slices from z-stacks of the same islet pre-saline, 3 days during Saline treatment, and 3 days post-saline treatment for Mouse C. The white dotted light highlights the starting islet area, while the red dotted line shows the islet area of that day's imaging. (C) Blood glucose was collected 30 minutes into anesthesia for each imaging session. Mouse A (black circles) and B (red squares) received STZ, while Mouse C (gray triangles) and D (black triangles) received saline injections. (D) Body weight (in grams) of mice that had undergone AIW study. (E) Islet area calculated for the largest x/y plane for 3 individual islets for Mouse B before, during, and after MLD-STZ challenge. (F) Ratiometric data the 3 individual islets from Mouse B using AAV8-INS-Grx1-roGFP2-labeled  $\beta$ -cells after 800/900 nm 2-photon excitation before, during, and after MLD-STZ challenge. (G) Aggregated islet area data from Mouse A (black circles), B (red squares), C (gray triangles), and D (black triangles) before, during, and after STZ or saline injections. (H) Ratiometric data from Mouse A (black circles), B (red squares), C (gray triangles), and D (black triangles) before, during, and after STZ or saline injections in AAV8-INS-Grx1-roGFP2-labeled  $\beta$ -cells after 800/900 nm 2-photon excitation before, during, and after MLD-STZ challenge.

512  
513  
514  
515  
516  
517  
518  
519  
520  
521  
522  
523  
524  
525  
526  
527  
528  
529  
530  
531

## Supplemental Figure 1

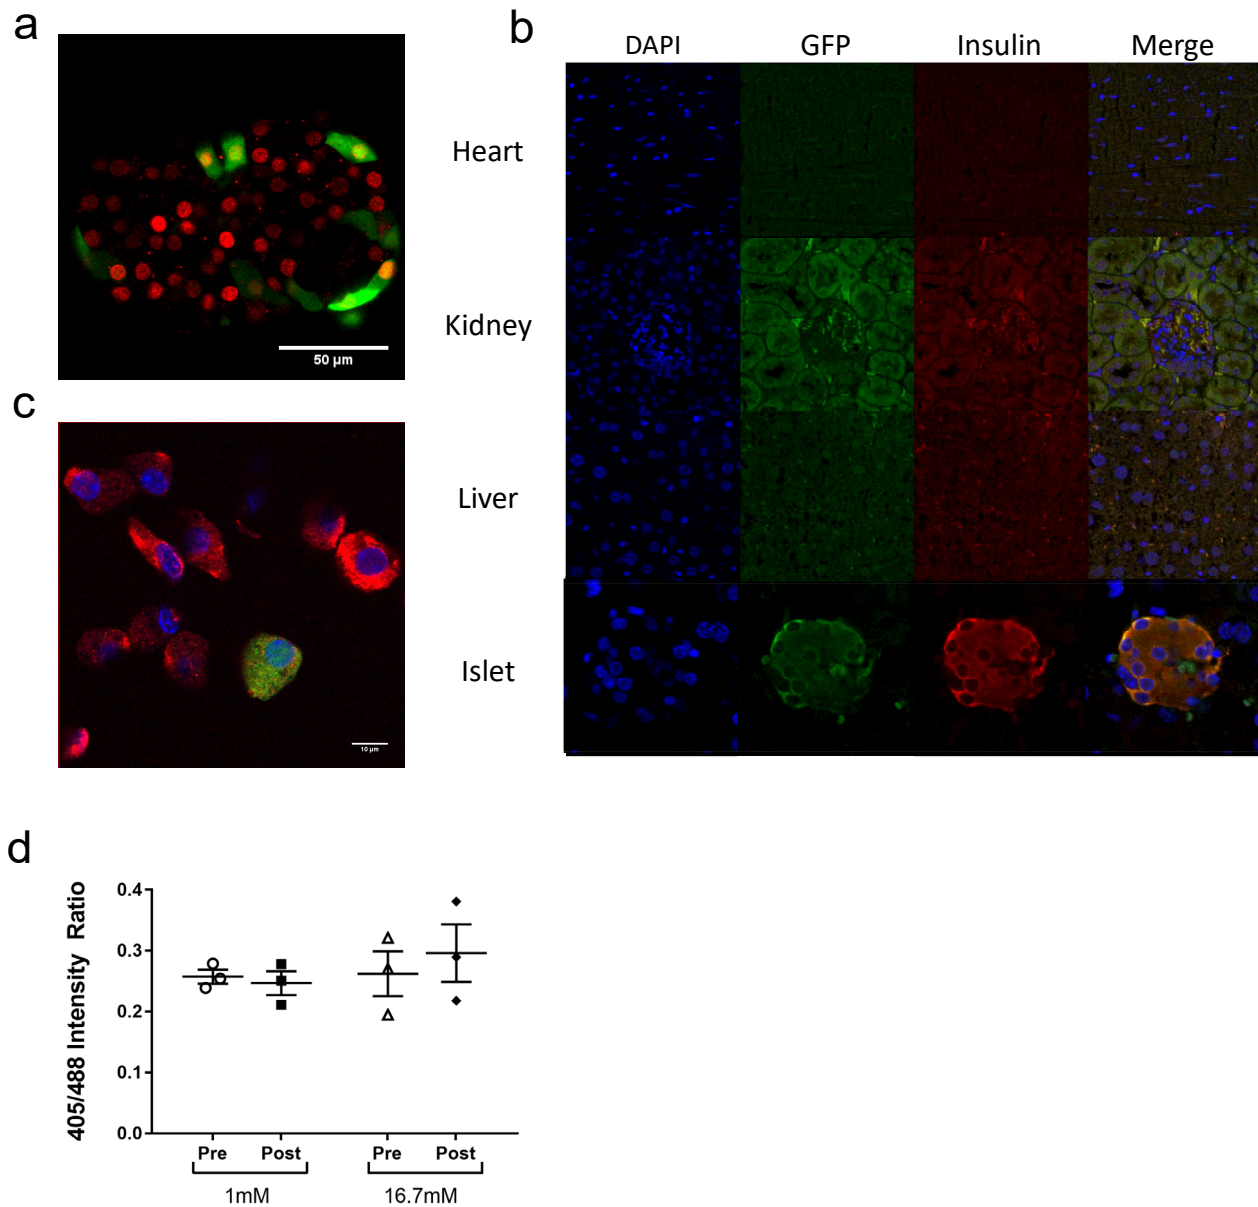

532  
533  
534  
535  
536  
537  
538  
539  
540  
541  
542  
543  
544  
545  
546

### Figure S1: Colocalization of Adeno- and AAV8- INS-Grx1-roGFP2 *in vitro* and *in vivo*

(A) Isolated islets from mice expressing an insulin-promoter driven ROSA26 nuclear H2B-mCherry were infected with Adeno-INS-Grx1-roGFP2 and imaged using a Zeiss LSM 800 confocal (Green – roGFP2, Red – mCherry). While not all  $\beta$ -cells are infected and express biosensor, all cells that are expressing roGFP2 are mCherry positive. (B) WT mice were IP injected with AAV8-INS-Grx1-roGFP2 3 weeks prior to pancreatectomy, paraffin-embedding, sectioning, and staining. An anti-GFP (to stain roGFP2) and anti-insulin antibodies were used to determine the localization of roGFP2 expression in heart, kidney, liver, and pancreas. (C) Islets were isolated from WT mice IP injected with AAV8-INS-Grx1-roGFP2 3 weeks prior. The islets were dispersed and stained as in (B) and imaged. While AAV8-INS-Grx1-roGFP2 does not label all insulin-positive cells, all GFP-positive cells are also insulin positive. (D) Islets isolated from WT mice were infected with Adeno-INS-Grx1-roGFP2 and treated with 1 and 16.7 mM glucose for 30 minutes. RoGFP2 ratios were collected before and after treatment, however, no changes in biosensor signal were observed. Data are means  $\pm$  SEM (N=3 mice, >3 islets per mouse).

## Supplemental Figure 2

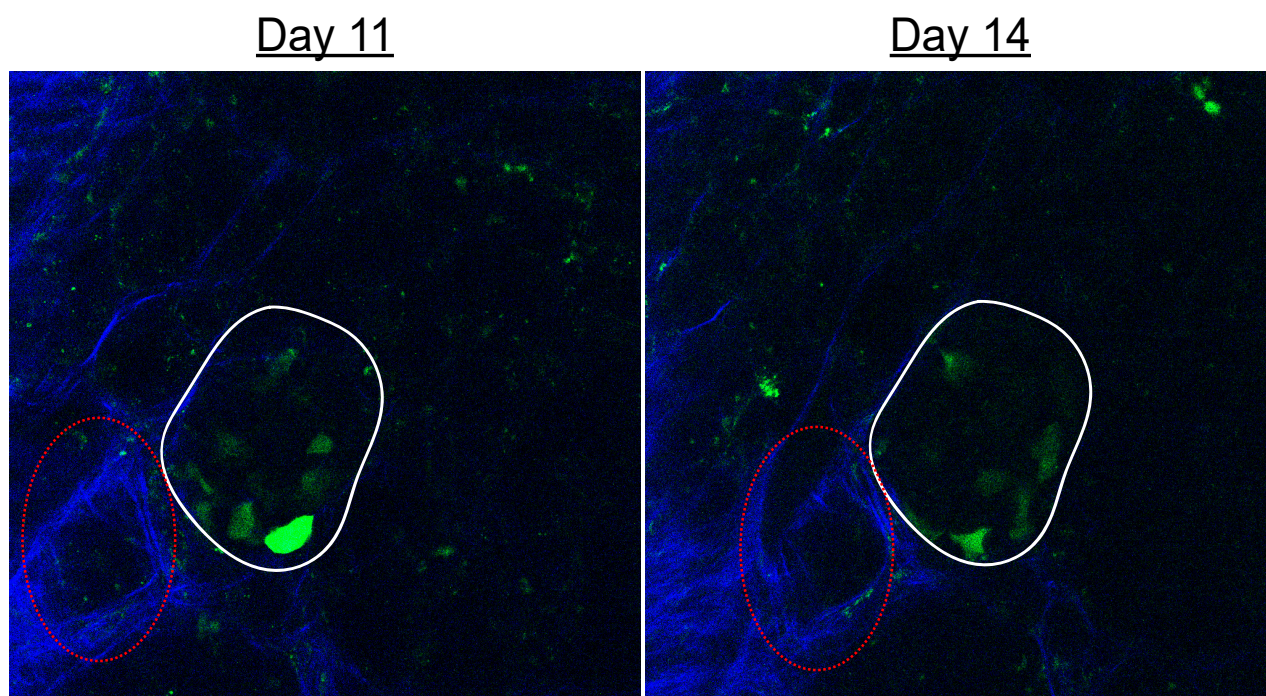

547  
548  
549  
550  
551  
552

### **Figure S2: Second Harmonics Act as a Fiduciary Marker**

Second harmonic generation from collagen was used as a fiduciary marker to return to islets between imaging sessions. Between days 11 and 14, the islet of interest is highlighted in white, while a unique collagen structure is highlighted in red.



### Supplemental Figure 3

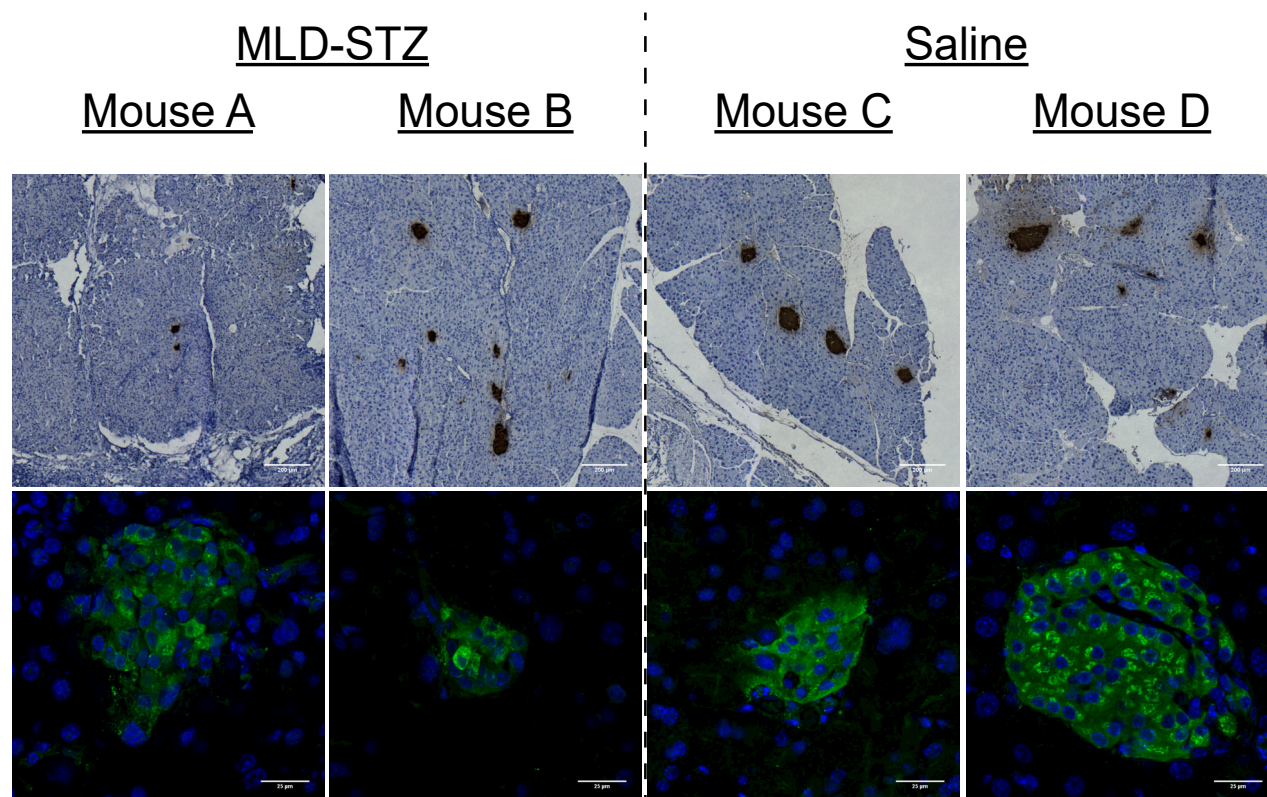

553  
554  
555  
556  
557

#### Figure S3: Endpoint Analysis of Pancreata after AIW Study

(A) Representative images of immunohistochemical images of pancreata from the pancreas of Mouse A-D. (B) Representative images of immunofluorescence images (DAPI – Blue, Insulin – Green) of islets from pancreata from Mouse A-D.
